# Supplementary material for: Ethanol–water ambient precipitation of {111} facets exposed Ag3PO4 tetrahedra and its hybrid with graphene oxide for outstanding photoactivity and stability
Source: Royal Society of Chemistry journal article supplement (doi:10.1039/c8qi00105g), 2018-01-01
Supplement: c8qi00105g1.pdf [file c8qi00105g1.pdf]

## Electronic Supporting Information (ESI)

### **Ethanol-water ambient precipitation of {111} facets exposed $\text{Ag}_3\text{PO}_4$ tetrahedra and the hybrid with graphene oxide for outstanding photoactivity and stability**

Guo-Ying Zhang\*, Xue-Min Wei, Xue Bai, Chun-Mei Liu, Bing-Yu Wang, Jing-Wang Liu

*Tianjin Key Laboratory of Structure and Performance for Functional Molecules; Key Laboratory of Inorganic-Organic Hybrid Functional Material Chemistry, Ministry of Education; College of Chemistry, Tianjin Normal University, Tianjin 300387, China*

---

\*Corresponding author. E-mail: [hxyzyg@tjnu.edu.cn](mailto:hxyzyg@tjnu.edu.cn) Fax: +86 22 23766532

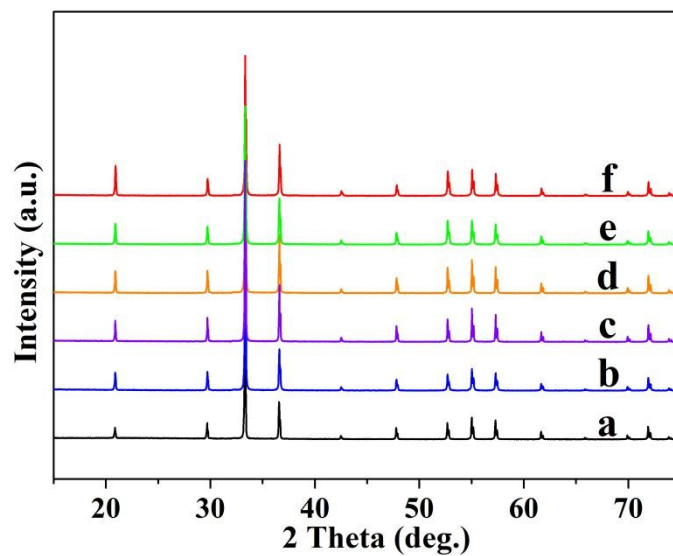

Fig. S1 XRD patterns of series  $\text{Ag}_3\text{PO}_4$  products obtained with ethanol volume of (a) 0 mL, (b) 3.0 mL, (c) 6.0 mL, (d) 9.0 mL, (e) 12.0 mL and (f) 17.0 mL.

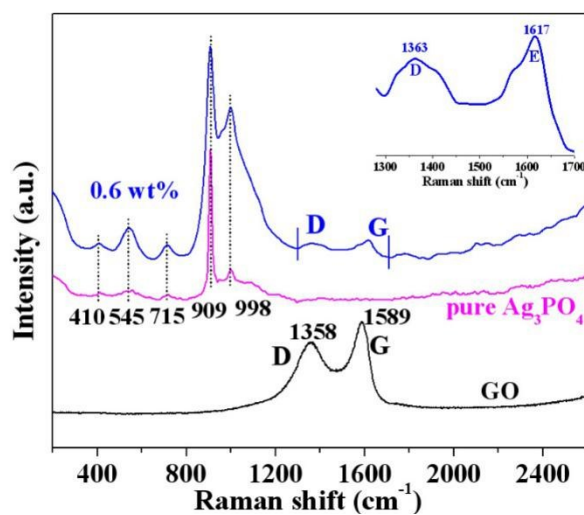

Fig S2. Raman spectra of GO sheets, pristine  $\text{Ag}_3\text{PO}_4$  and  $\text{GO}/\text{Ag}_3\text{PO}_4$ -0.6wt% hybrid with magnified D and G bands in inset.

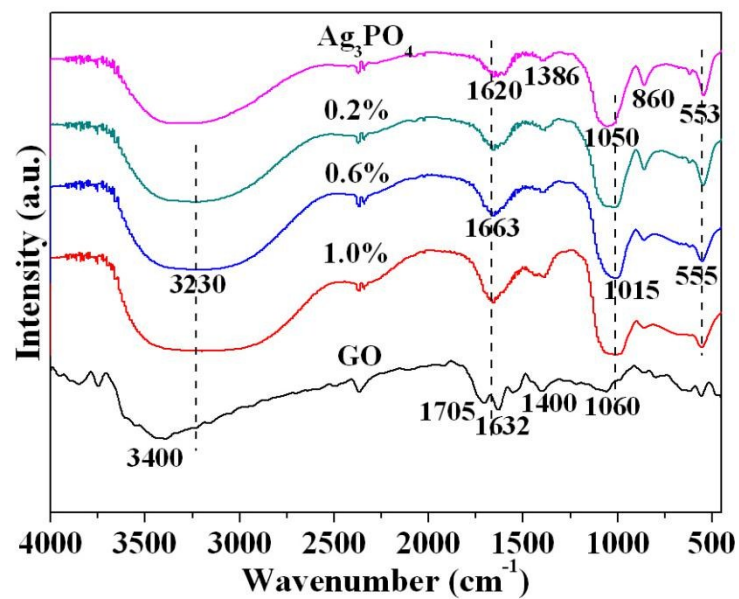

Fig. S3 FTIR spectra of GO, Ag<sub>3</sub>PO<sub>4</sub> and series GO/Ag<sub>3</sub>PO<sub>4</sub> hybrids.

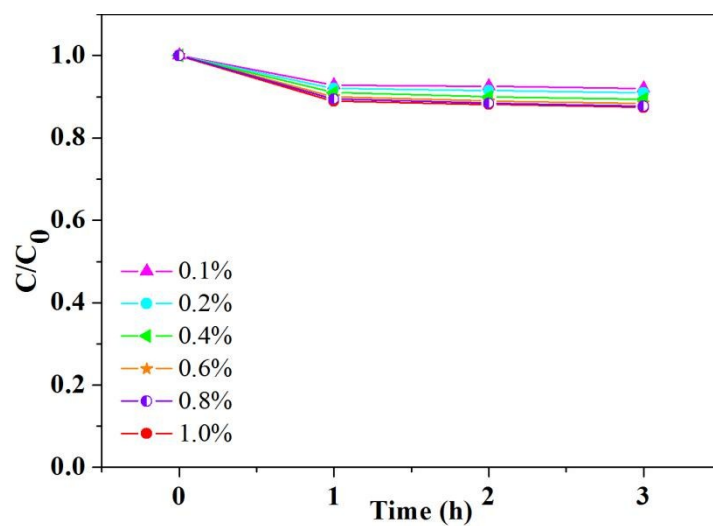

Fig. S4 Adsorption-desorption experiments of GO/Ag<sub>3</sub>PO<sub>4</sub> hybrids.

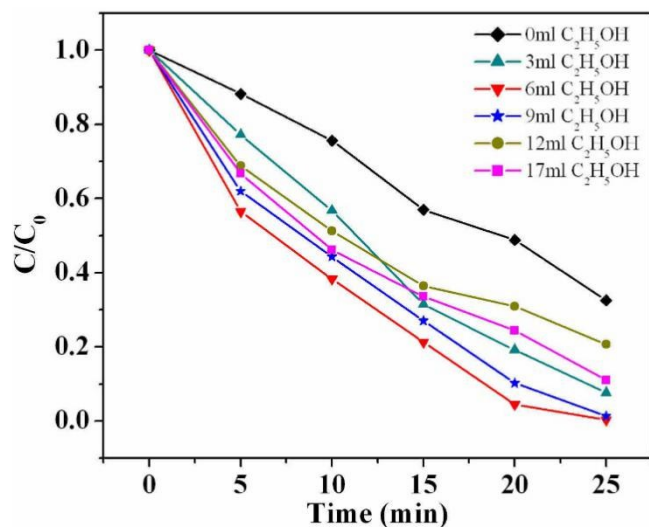

Fig. S5 Photocatalytic degradation of RhB in 25 min irradiation over series Ag<sub>3</sub>PO<sub>4</sub> samples prepared in ethanol-water solvent with different ethanol volume.

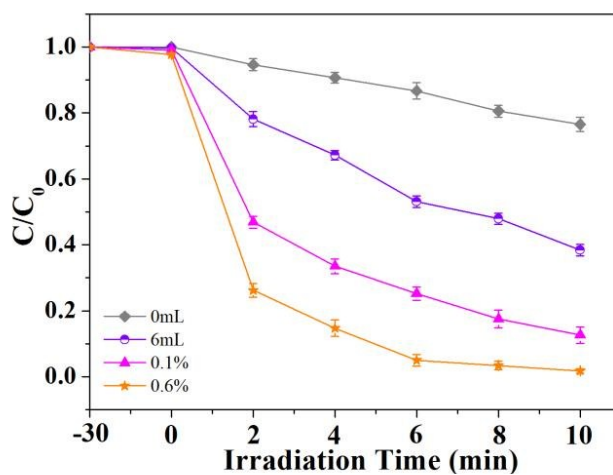

Fig. S6 Reproducibility of bare Ag<sub>3</sub>PO<sub>4</sub> bulks and tetrahedra obtained without and with 6.0 mL ethanol as well as GO hybridized Ag<sub>3</sub>PO<sub>4</sub> tetrahedra with different GO amount.

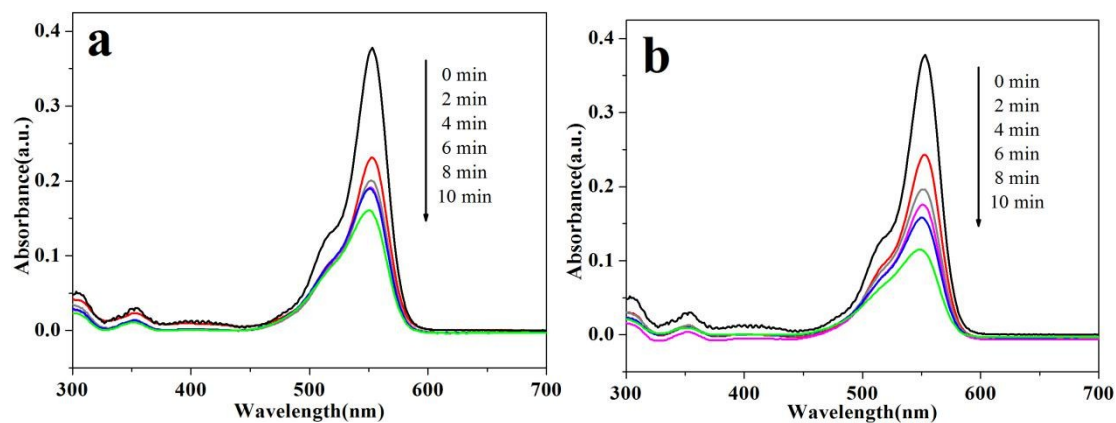

Fig. S7 Temporal evolution of RhB absorption over GO hybridized  $\text{Ag}_3\text{PO}_4$  nanoparticles in Refs [23] (a) and [25] (b), respectively.

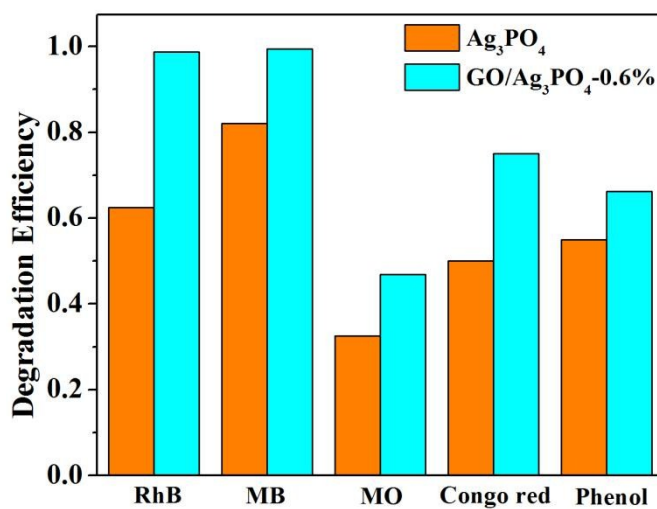

Fig. S8 Comparison of photocatalytic activity to different dyes in 10 min and to colorless phenol in 30 min over the  $\text{Ag}_3\text{PO}_4$  tetrahedra and GO/ $\text{Ag}_3\text{PO}_4$ -0.6wt% hybrid.

Table S1 Band potential levels of Ag<sub>3</sub>PO<sub>4</sub> tetrahedra calculated from absolute electronegativity of the semiconductor.

| Semiconductor                   | Absolute electronegativity(X) | Estimated band-gap E <sub>g</sub> (eV) | Calculated CB edge (V) | Calculated VB edge (V) |
|---------------------------------|-------------------------------|----------------------------------------|------------------------|------------------------|
| Ag <sub>3</sub> PO <sub>4</sub> | 5.96                          | 2.08                                   | 0.42                   | 2.50                   |

The valence band (VB) and conduction band (CB) potentials of Ag<sub>3</sub>PO<sub>4</sub> tetrahedra are theoretically calculated by the equation  $E_{CB}^0 = X - E^c - 1/2E_g$ , where  $X$  is the absolute electronegativity of Ag<sub>3</sub>PO<sub>4</sub>,  $E^c$  is the energy of free electrons on the hydrogen scale (ca. 4.5 eV), and  $E_g$  is the band gap of Ag<sub>3</sub>PO<sub>4</sub> tetrahedra which can be obtained from the DRS spectrum.
